# Supplementary material
Source: PubMed Central journal article supplement (PMC5718567)
Supplement: AnnalsATS.201611-875OC_detsky_data_supplement.pdf [file AnnalsATS.201611-875OC_detsky_data_supplement.pdf]

## Online Data Supplement

### **Six-Month Morbidity and Mortality among ICU Patients Receiving Life-Sustaining Therapy: A Prospective Cohort Study**

Michael E. Detsky, M.D., M.S.H.P., Michael O. Harhay, Ph.D., M.P.H., Dominique F. Bayard, M.D., Aaron M. Delman, B.A., Anna E. Buehler, B.A., Saida A. Kent, B.A., Isabella V. Ciuffetelli, B.A., Elizabeth Cooney, M.P.H., Nicole B. Gabler, Ph.D., M.H.A., Sarah J. Ratcliffe, Ph.D., Mark E. Mikkelsen, M.D., M.Sc., Scott D. Halpern, M.D., Ph.D.

Table 1. Exclusion criteria

Table 2. Potential variables included in multivariable model building strategy, primary analysis

Table 3. Patient outcomes compared to baseline function

Table 4. Outcomes reported by patients and surrogates<sup>a</sup>

Figure 1. Six month outcomes for patients who were a. not normal at baseline b. normal at baseline

Table 5. Unadjusted analyses of predictors of six-month return to baseline<sup>a</sup>

Table 6. Predictors of six-month return to baseline restricted to patients' enrolled on days 3 and 4 (n=212)

Table 7. Predictors of six-month return to baseline restricted to variables available prior to ICU admission (n=293)

Figure 2. Hosmer-Lemeshow plot and table comparing observed outcomes to predicted outcomes in model restricted to patients enrolled on days 3

Table 1. Exclusion criteria

Patients less than 18 years of age

Patients for whom we could not obtain consent (e.g., unavailable surrogate, physician refusal)

Patients for whom we could not conduct long-term follow up (inability to speak English, home address unavailable)

Immediate plan to move to palliation or hospice

Incarcerated individuals

Prior enrollment in the study on earlier ICU admission

Neurosurgical and trauma patients

Table 2. Potential variables included in multivariable model building strategy, primary analysis

| <b>Demographics</b>          | <b>Definition</b>                                                                                                                                                                                                        |
|------------------------------|--------------------------------------------------------------------------------------------------------------------------------------------------------------------------------------------------------------------------|
| Age                          | Age at time                                                                                                                                                                                                              |
| Gender                       | Male or female                                                                                                                                                                                                           |
| Education                    | Some college or higher                                                                                                                                                                                                   |
| Insurance status             | Private insurance                                                                                                                                                                                                        |
| Employment/student status    | Employed or a student just prior to critical illness                                                                                                                                                                     |
| Marital status               | Married or living with a partner                                                                                                                                                                                         |
| Race                         | White                                                                                                                                                                                                                    |
| <b>Past health history</b>   |                                                                                                                                                                                                                          |
| Baseline walk up 10 stairs   | Able to ambulate up 10 stairs without the assistance of another person                                                                                                                                                   |
| Baseline normal cognition    | Able to remember most things, think clearly and solve day-to-day problems                                                                                                                                                |
| Toileting independently      | Able to go to the toilet room, clean oneself and arrange clothes without assistance (may use object for support such as cane, walker, or wheel chair and may manage night bedpan or commode, emptying the same morning). |
| Hospitalized in prior year   | Patient admitted to hospital in the past 12 months                                                                                                                                                                       |
| Functional comorbidity index | A 0-18 point scale based on comorbidities associated with impaired function. One point is assigned for the presence of each comorbidity. Presence of stroke or neuromuscular weakness                                    |
| Neurological condition       | On dialysis prior to critical illness                                                                                                                                                                                    |
| Renal failure                | History of congestive heart failure                                                                                                                                                                                      |
| Congestive heart failure     | History of coronary artery disease                                                                                                                                                                                       |
| Coronary artery disease      | History of cancer which could be prior treatment or metastatic disease with palliation                                                                                                                                   |
| Cancer                       | History of liver disease                                                                                                                                                                                                 |
| Liver disease                | BMI >30.0                                                                                                                                                                                                                |
| Obesity                      | History of peripheral vascular disease                                                                                                                                                                                   |
| Peripheral vascular disease  | <b>ICU related health</b>                                                                                                                                                                                                |
| ICU type                     | Medical ICU vs. surgical ICU                                                                                                                                                                                             |
| APACHE III                   | Severity of illness score used to predict in hospital mortality                                                                                                                                                          |

Table 3. Patient outcomes compared to baseline function<sup>a</sup>

| Outcome                                         | Normal Baseline | Abnormal Baseline | Unadjusted P value | Adjusted P value <sup>b</sup> |
|-------------------------------------------------|-----------------|-------------------|--------------------|-------------------------------|
| Survived Hospital                               | 78.9 (161/204)  | 70.8 (68/96)      | 0.124              | 0.247                         |
| 6 month survival                                | 61.4 (124/202)  | 47.9 (45/94)      | 0.029              | 0.573                         |
| Return to original place of residence           | 55.0 (111/202)  | 30.9 (29/94)      | <0.001             | 0.017                         |
| Ambulating 10 stairs independently <sup>c</sup> | 83.6 (102/122)  | 37.2 (16/43)      | <0.001             | <0.0001                       |
| Toileting independently <sup>c</sup>            | 92.7 (114/123)  | 51.2 (22/43)      | <0.001             | <0.0001                       |
| Normal cognition <sup>c</sup>                   | 68.0 (83/122)   | 46.5 (20/43)      | 0.012              | 0.104                         |
| Return to baseline                              | 35.3 (71/201)   | 25.0 (23/92)      | 0.079              | 0.911                         |

<sup>a</sup>Presented as a percentage, raw numbers are presented in brackets.

<sup>b</sup>Adjusted for age, race, hospitalization in the prior year, functional comorbidity index and APACHE III

<sup>c</sup>Percent of patients is among survivors in each group.

Table 4. Outcomes reported by patients and surrogates<sup>a</sup>

| Outcome                      | Patients     | Surrogates   | Unadjusted P Value | Adjusted P value <sup>b</sup> |
|------------------------------|--------------|--------------|--------------------|-------------------------------|
| Able to ambulating 10 stairs | 81.7 (67/82) | 61.4 (51/83) | 0.005              | 0.015                         |
| Able to toilet               | 92.7 (76/82) | 71.4 (60/84) | 0.001              | 0.003                         |
| Normal cognition             | 72.0 (59/82) | 53.0 (44/83) | 0.013              | 0.048                         |

<sup>a</sup>Presented as a percentage, raw numbers for each category reported in brackets

<sup>b</sup>Adjusted for age, race, hospitalization in the prior year, functional comorbidity index and APACHE III

Figure 1. Six month outcomes for patients who were  
a. not normal at baseline b. normal at baseline<sup>a, b</sup>

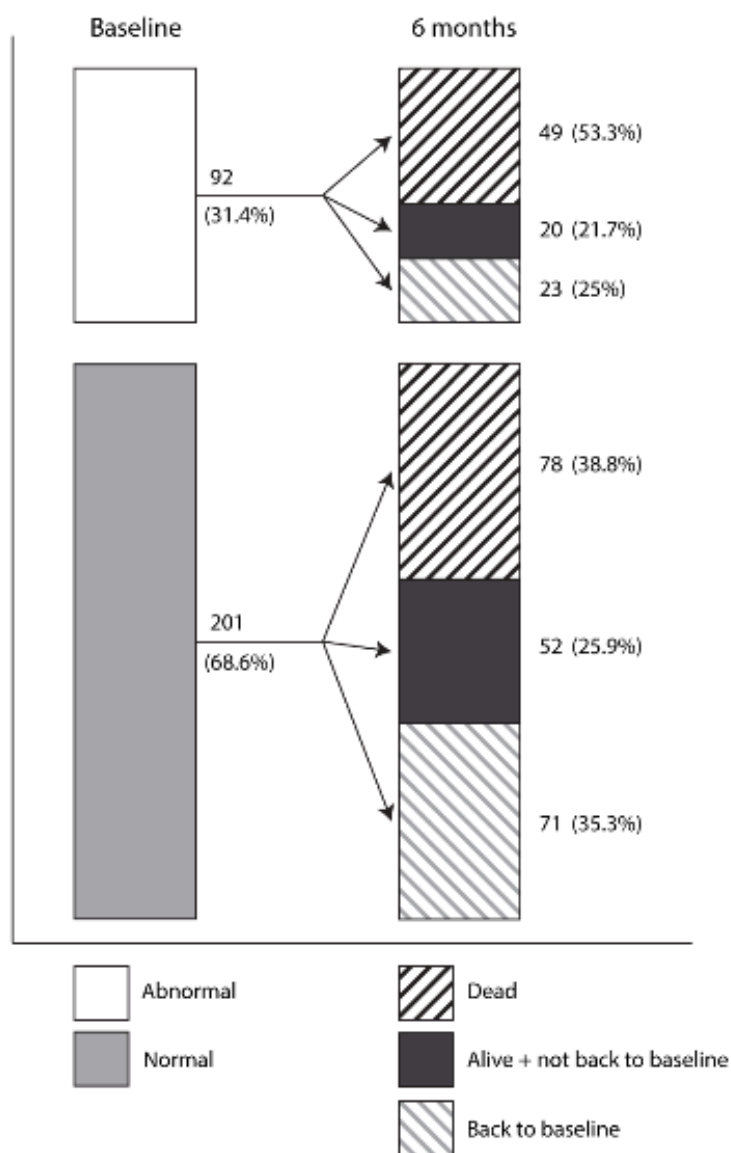

<sup>a</sup>4 patients were lost to follow up, 3 had partial follow up and 3 had survivors had incomplete assessments of baseline function, thus complete assessments of baseline and six month function were available for 293 patients.

<sup>b</sup> Normal baseline is at home and normal function with respect to ambulating 10 stairs, toileting and cognition. Abnormal baseline is one of the following, not from home or abnormal function in any of the following, ambulating 10 stairs, toileting or cognition.

Table 5. Unadjusted analyses of predictors of six-month return to baseline<sup>a</sup>

|                                                          | Not return to<br>baseline (n=199) | Return to baseline<br>(n=94) | P value |
|----------------------------------------------------------|-----------------------------------|------------------------------|---------|
| Age, median, IQR, years                                  | 63 (54-71)                        | 59 (50-70)                   | 0.06    |
| Male gender, n, (%)                                      | 110 (55.3)                        | 59 (62.8)                    | 0.23    |
| Education (minimum some<br>college), n, (%)              | 92 (46.2)                         | 53 (56.4)                    | 0.11    |
| Married (or living with a<br>partner), n, (%)            | 99 (49.8)                         | 48 (51.1)                    | 0.83    |
| Race (white), n, (%)                                     | 115 (57.8)                        | 69 (73.4)                    | 0.01    |
| Insurance status (private), n,<br>(%)                    | 68 (34.2)                         | 36 (38.3)                    | 0.49    |
| Employed or student prior to<br>critical illness, n, (%) | 50 (25.5)                         | 37 (39.4)                    | 0.02    |
| Baseline function, n, (%):                               |                                   |                              |         |
| Walk up 10 stairs                                        | 159 (79.9)                        | 79 (84.0)                    | 0.40    |
| Toilet                                                   | 175 (87.9)                        | 85 (90.4)                    | 0.53    |
| Normal cognition                                         | 164 (82.4)                        | 79 (84.0)                    | 0.73    |
| Comorbidities, n, (%)                                    |                                   |                              |         |
| Neurologic condition                                     | 43 (21.6)                         | 12 (12.8)                    | 0.07    |
| Congestive heart failure                                 | 76 (38.2)                         | 32 (34.0)                    | 0.49    |
| Coronary artery disease                                  | 66 (33.2)                         | 36 (38.3)                    | 0.39    |
| COPD                                                     | 41 (20.6)                         | 21 (22.3)                    | 0.73    |
| Renal failure requiring<br>dialysis                      | 21 (10.6)                         | 7 (7.5)                      | 0.40    |
| Liver disease                                            | 29 (14.6)                         | 5 (5.3)                      | 0.02    |
| Peripheral vascular<br>disease                           | 44 (22.1)                         | 15 (16.0)                    | 0.22    |
| Obesity                                                  | 64 (32.2)                         | 38 (40.4)                    | 0.17    |
| Cognitive impairment                                     | 13 (6.5)                          | 4 (4.3)                      | 0.44    |
| Malignancy                                               | 73 (36.7)                         | 21 (22.3)                    | 0.014   |
| Transplant history <sup>b</sup>                          | 19 (9.6)                          | 1 (1.0)                      | 0.007   |
| Number of comorbidities, n,<br>(%)                       |                                   |                              |         |
| 0                                                        | 5 (2.5)                           | 6 (6.4)                      | 0.29    |
| 1                                                        | 28 (14.1)                         | 17(18.1)                     |         |
| 2                                                        | 52 (26.1)                         | 30 (31.9)                    |         |
| 3                                                        | 48 (24.1)                         | 17 (18.1)                    |         |
| 4                                                        | 41 (20.6)                         | 16 (17.0)                    |         |
| ≥5                                                       | 25 (12.6)                         | 8 (8.5)                      |         |
| Hospitalized in the past year,<br>n, (%)                 | 150 (75.4)                        | 54 (57.4)                    | 0.004   |
| APACHE III, median IQR                                   | 103 (82-125)                      | 83 (66-109)                  | 0.0001  |
| MICU, n, (%)                                             | 139 (69.9)                        | 42 (44.7)                    | 0.0001  |
| FCI median, IQR                                          | 4 (2-5)                           | 3 (2-5)                      | 0.41    |
| 3 day fluid balance <sup>c</sup>                         | 4.22 (1.60-8.05)                  | 3.87 (1.32-6.53)             | 0.30    |

Table 5 continued

|                                                  |            |            |        |
|--------------------------------------------------|------------|------------|--------|
| NMBA <sup>d</sup> infusion, n, (%)               | 38 (19.1)  | 11 (11.7)  | 0.11   |
| Analgesia infusion, n, (%)                       | 144 (72.4) | 60 (63.8)  | 0.14   |
| Sedation infusion, n, (%)                        | 124 (62.3) | 66 (70.2)  | 0.19   |
| Antipsychotics, n, (%)                           | 83 (41.7)  | 32 (34.0)  | 0.21   |
| Dialysis, n, (%)                                 | 52 (26.1)  | 10 (10.6)  | 0.002  |
| ICU LOS median, IQR                              | 9 (6-14)   | 7 (5-11)   | 0.003  |
| Hospital LOS, median IQR                         | 19 (11-29) | 16 (10-25) | 0.07   |
| Goals of care made palliative in the ICU, n, (%) | 71 (35.7)  | 1 (1.1)    | <0.001 |
| Discharged home, n, (%)                          | 36 (18.1)  | 52 (55.3)  | <0.001 |

<sup>a</sup>presented as proportion with % in brackets or median with interquartile range in brackets

<sup>b</sup>combined lung, liver, kidney and bone marrow transplants

<sup>c</sup>measured in liters

<sup>d</sup> NMBA=neuromuscular blocking agent



Table 6. Predictors of six-month return to baseline restricted to patients' enrolled on days 3 and 4 (n=212)<sup>a</sup>

| Variable                   | Odds Ratio | 95% CI     |
|----------------------------|------------|------------|
| APACHE III <sup>b</sup>    | 0.82       | 0.73, 0.91 |
| Race (non white)           | 0.33       | 0.15, 0.71 |
| History of cancer          | 0.38       | 0.17, 0.82 |
| Hospitalized in prior year | 0.56       | 0.28, 1.15 |
| Liver disease              | 0.45       | 0.13, 1.57 |
| Neurologic disease         | 0.71       | 0.26, 1.93 |
| Age                        | 0.99       | 0.97, 1.01 |
| Medical patient            | 0.47       | 0.23, 0.96 |

<sup>a</sup>History of transplant was not in the model as no patients with a history of transplant returned to baseline in this model (n=16).

<sup>b</sup>For APACHE III score, this is represented as each 10-point increase.

Table 7. Predictors of six-month return to baseline restricted to variables available prior to ICU admission (n=293)

| Variable                           | Odds Ratio | 95% CI     |
|------------------------------------|------------|------------|
| History of cancer                  | 0.42       | 0.23, 0.78 |
| Race (non white)                   | 0.41       | 0.22, 0.74 |
| History of transplant <sup>c</sup> | 0.11       | 0.01, 0.84 |
| Age                                | 0.98       | 0.97, 1.00 |
| Hospitalized in prior year         | 0.58       | 0.33, 1.01 |
| Neurological disease               | 0.47       | 0.22, 0.99 |
| Liver disease                      | 0.29       | 0.10, 0.82 |

Figure 2. Hosmer-Lemeshow plot and table comparing observed outcomes to predicted outcomes in model restricted to patients enrolled on days 3 and 4

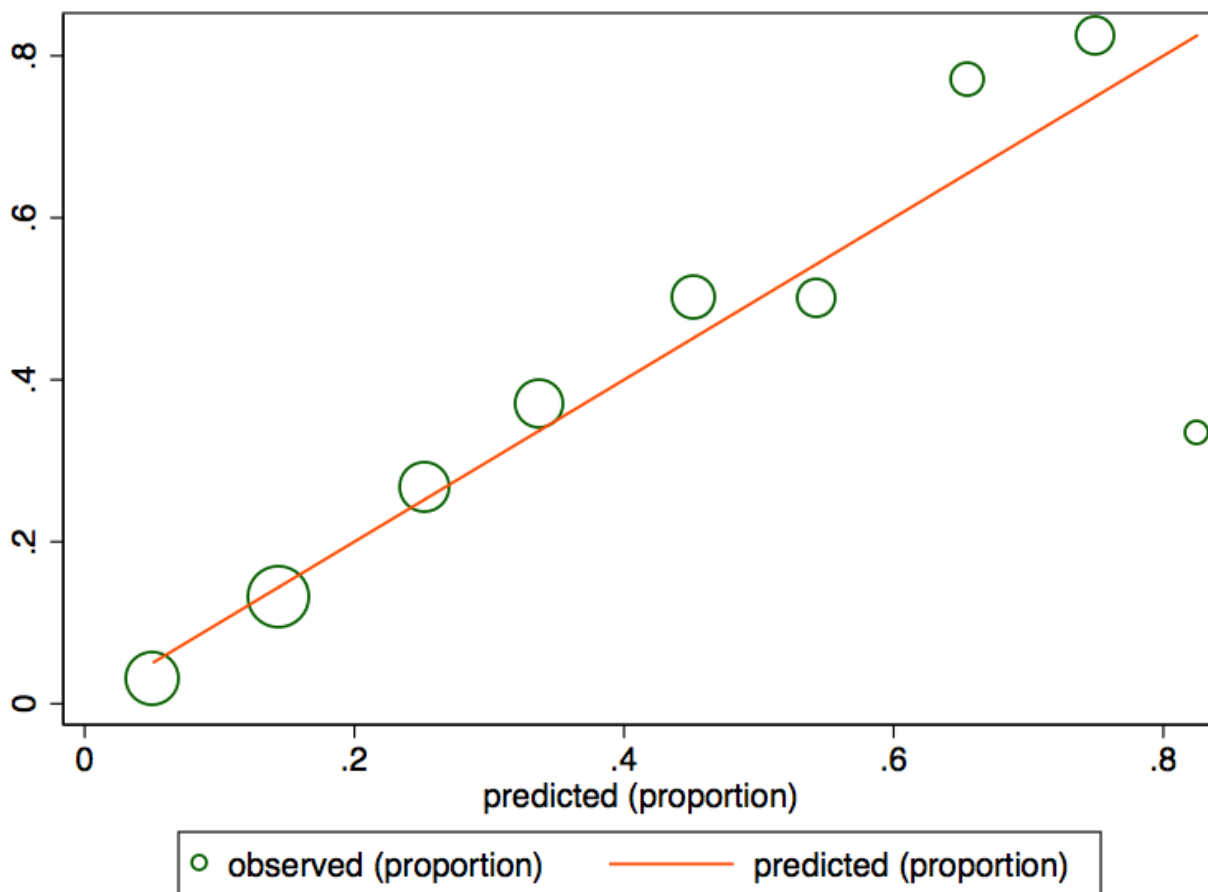

| Decile | Number of patients | Observed (%) | Expected (%) | Hosmer-Lemeshow |
|--------|--------------------|--------------|--------------|-----------------|
| 1      | 33                 | 1 (3.0)      | 1.7 (9.4)    | 0.30            |
| 2      | 46                 | 6 (13.0)     | 6.7 (14.5)   | 0.07            |
| 3      | 30                 | 8 (26.7)     | 7.6 (25.3)   | 0.03            |
| 4      | 27                 | 10 (37.0)    | 9.1 (33.8)   | 0.13            |
| 5      | 22                 | 11 (50.0)    | 10.0 (45.2)  | 0.20            |
| 6      | 18                 | 9 (50.0)     | 9.8 (54.4)   | 0.14            |
| 7      | 13                 | 10 (76.9)    | 8.5 (65.5)   | 0.75            |
| 8      | 17                 | 14 (82.4)    | 12.8 (75.0)  | 0.49            |
| 9      | 6                  | 2 (33.3)     | 4.9 (82.5)   | 10.04           |
| Total  | 212                | 71 (33.5)    | 71.0 (33.5)  | 12.16           |

Figure 3. Hosmer-Lemeshow plot and table comparing observed outcomes to predicted outcomes in model restricted to variables available prior to ICU admission

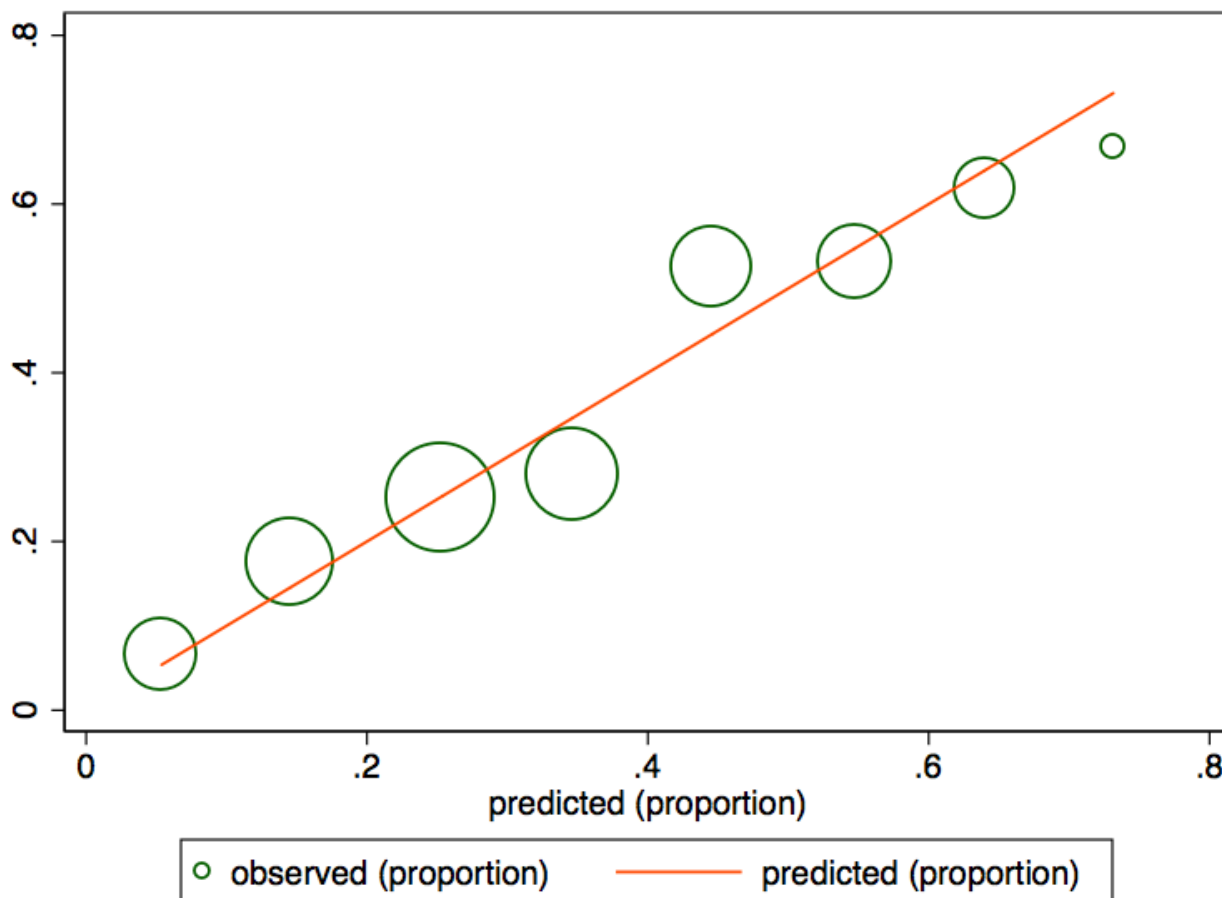

| Decile | Number of patients | Observed (%) | Expected (%) | Hosmer-Lemeshow |
|--------|--------------------|--------------|--------------|-----------------|
| 1      | 31                 | 2 (6.5)      | 1.7 (5.4)    | 0.07            |
| 2      | 46                 | 8 (17.4)     | 6.7 (14.5)   | 0.30            |
| 3      | 72                 | 18 (25.0)    | 18.3 (25.4)  | 0.01            |
| 4      | 50                 | 14 (28.0)    | 17.3 (34.6)  | 0.96            |
| 5      | 38                 | 20 (52.6)    | 16.9 (44.6)  | 0.99            |
| 6      | 32                 | 17 (53.1)    | 17.5 (54.7)  | 0.03            |
| 7      | 21                 | 13 (61.9)    | 13.4 (64.0)  | 0.04            |
| 8      | 3                  | 2 (66.7)     | 2.2 (73.1)   | 0.06            |
| Total  | 293                | 94 (32.1)    | 94 (32.1)    | 2.46            |
